# Supplementary material for: LncRNA OIP5-AS1 modulates the proliferation and apoptosis of Jurkat cells by sponging miR-181c-5p to regulate IL-7 expression in myasthenia gravis
Source: PeerJ. 2022 May 17;10:e13454. doi: 10.7717/peerj.13454 (PMC9121865; doi:10.7717/peerj.13454)
Supplement: Supplemental Information 2 — (A) OIP5-AS1 expression was examined in MG patients and control subjects by real-time PCR. (B) miR-181c-5p expression was examined in MG patients and control subjects by real-time PCR. (C) Pearson’s correlation was performed to analyze the correlation between OIP5-AS1 and miR-181c-5p expression in PBMCs of MG patients. The experiment was repeated at least three times, and the data are presented as the mean ± SD. *p < 0.05, **p < 0.01, ***p < 0.001. [file peerj-10-13454-s002.xlsx]

## Sheet: Sheet1
Figure 1A			Figure 1B			Figure 1C
Control	MG		Control	MG		miR-181c-5p	OIP5-AS1
0.337315	0.871859		0.608221	0.462011		1.22774	0.871859
0.480353	0.904693		0.62532	0.466301		1.41683	0.904693
0.528082	0.908883		0.634049	0.473904		0.932602	0.908883
0.644164	0.95407		0.693836	0.488354		1.06388	0.95407
0.653156	0.99		0.719966	0.513819		1.01819	0.99
0.719716	1.00382		0.77164	0.524616		0.473904	1.00382
0.73995	1.00382		0.795169	0.530712		0.810003	1.00382
0.769593	1.0108		0.828936	0.574084		0.662504	1.0108
0.794893	1.02728		0.858169	0.618138		1.16824	1.02728
0.796732	1.05616		0.878228	0.632586		0.713342	1.05616
0.80599	1.15042		0.9071	0.662504		0.945621	1.15042
0.84216	1.17731		0.945621	0.695441		1.29474	1.17731
0.873876	1.22165		0.988057	0.713342		0.896681	1.22165
0.890179	1.22165		1.00185	0.738498		1.17229	1.22165
0.900522	1.25021		1.00649	0.762777		0.618138	1.25021
1.02255	1.37443		1.03958	0.780606		0.462011	1.37443
1.09847	1.38399		1.04439	0.810003		1.07624	1.38399
1.27353	1.40007		1.12194	0.876201		0.780606	1.40007
1.27353	1.40007		1.13498	0.880259		1.12194	1.40007
1.28535	1.40656		1.16959	0.896681		0.978968	1.40656
1.36809	1.42619		1.18591	0.932602		0.762777	1.42619
1.40656	1.46968		1.20525	0.945621		0.695441	1.46968
1.44276	1.48675		1.24775	0.967723		1.41683	1.48675
1.50056	1.51449		1.25643	0.978968		0.513819	1.51449
1.54989	1.54989		1.27692	1.01819		0.876201	1.54989
1.55348	1.60826		1.33422	1.06388		0.488354	1.60826
1.62883	1.66497		1.38127	1.07624		0.574084	1.66497
1.78036	1.72369		1.4038	1.12194		0.967723	1.72369
1.78448	1.73568		1.42011	1.16824		0.466301	1.73568
1.85168	1.81987		1.49071	1.17229		0.738498	1.81987
	1.95726			1.22774		0.632586	1.95726
	2.03097			1.29474		0.530712	2.03097
	2.05932			1.41683		0.880259	2.05932
	2.15173			1.41683		0.524616	2.15173
Figure 1A
Levene's Test for Equality of Variances		t-test for Equality of Means
F	Sig.	t	df	Sig. (2-tailed)	Mean Difference	Std. Error Difference	95% Confidence Interval of the Difference
							Lower	Upper
2.561	0.115	-2.978	62	0.0041	-0.29334	0.09849	-0.49021	-0.09647
Figure 1B
Levene's Test for Equality of Variances		t-test for Equality of Means
F	Sig.	t	df	Sig. (2-tailed)	Mean Difference	Std. Error Difference	95% Confidence Interval of the Difference
							Lower	Upper
0.33	0.568	2.694	62	0.0091	0.182439	0.06772	0.04707	0.317807
Figure 1C
Pearson r
r	-0.4467
95% confidence interval	-0.6819 to -0.1279
R squared	0.1996
P value
P (two-tailed)	0.0081
P value summary	**
Significant? (alpha = 0.05)	Yes
Number of XY Pairs	34
