# Supplementary material for: LncRNA OIP5-AS1 modulates the proliferation and apoptosis of Jurkat cells by sponging miR-181c-5p to regulate IL-7 expression in myasthenia gravis
Source: PeerJ. 2022 May 17;10:e13454. doi: 10.7717/peerj.13454 (PMC9121865; doi:10.7717/peerj.13454)
Supplement: Supplemental Information 3 — (A) The transfection efficiency of miR-181c-5p mimics and miR-181c-5p inhibitor were measured by real-time PCR. (B) The relative expression level of OIP5-AS1 in Jurkat cells transfected with miR-181c-5p mimics or miR-181c-5p inhibitor was measured using real-time PCR. (C) The expression of OIP5-AS1 in Jurkat cells transfected with shRNA against OIP5-AS1 (shRNA-1, shRNA-2, and shRNA-3), or negative control (shRNA NC) was measured using real-time PCR. The shRNA-1 with better knockdown efficiency was used for subsequent experiment, named shOIP5-AS1. (D) The relative expression level of miR-181c-5p in Jurkat cells transfected with shRNA NC or shOIP5-AS1 was measured using real-time PCR. (E) The putative miR-181c-5p binding sequence of the wide-type and mutation sequence of OIP5-AS1. (F) The luciferase reporter plasmid containing OIP5-AS1-WT or OIP5-AS1-MUT was co-transfected with miR-181c-5p mimics or miRNA NC into HEK293T cells. The experiment was repeated at least three times, and the data are presented as the mean ± SD.*p < 0.05, **p < 0.01, ***p < 0.001. ns, no significant. [file peerj-10-13454-s003.xlsx]

## Sheet: Sheet1
Figure 2A
Medium control	mimics NC	miR-181c-5p mimics	inhibitor NC	miR-181c-5p inhibitor
0.96	1.15	9.89	1.05	0.25
1.05	0.98	9.62	1	0.22
0.99	0.96	10.53	0.92	0.21
Tukey's multiple comparisons test	Mean Diff.	95.00% CI of diff.	Significant?	Summary	Adjusted P Value
Medium control vs. mimics NC	-0.03	-0.6140 to 0.5540	No	ns	0.9998
Medium control vs. miR-181c-5p mimics	-9.013	-9.597 to -8.429	Yes	****	<0.0001
Medium control vs. inhibitor NC	0.01	-0.5740 to 0.5940	No	ns	>0.9999
Medium control vs. miR-181c-5p inhibitor	0.7733	0.1893 to 1.357	Yes	**	0.0097
mimics NC vs. miR-181c-5p mimics	-8.983	-9.567 to -8.399	Yes	****	<0.0001
mimics NC vs. inhibitor NC	0.04	-0.5440 to 0.6240	No	ns	0.9993
mimics NC vs. miR-181c-5p inhibitor	0.8033	0.2193 to 1.387	Yes	**	0.0076
miR-181c-5p mimics vs. inhibitor NC	9.023	8.439 to 9.607	Yes	****	<0.0001
miR-181c-5p mimics vs. miR-181c-5p inhibitor	9.787	9.203 to 10.37	Yes	****	<0.0001
inhibitor NC vs. miR-181c-5p inhibitor	0.7633	0.1793 to 1.347	Yes	***	<0.001
Figure 2B
Medium control	mimics NC	miR-181c-5p mimics	inhibitor NC	miR-181c-5p inhibitor
1.04	1.04	0.26	1.11	3.07
0.96	0.98	0.28	1.01	3.18
1	0.91	0.24	1.14	2.87
Tukey's multiple comparisons test	Mean Diff.	95.00% CI of diff.	Significant?	Summary	Adjusted P Value
Medium control vs. mimics NC	0.02333	-0.2033 to 0.2500	No	ns	0.9967
Medium control vs. miR-181c-5p mimics	0.74	0.5134 to 0.9666	Yes	****	<0.0001
Medium control vs. inhibitor NC	-0.08667	-0.3133 to 0.1400	No	ns	0.7202
Medium control vs. miR-181c-5p inhibitor	-2.04	-2.267 to -1.813	Yes	****	<0.0001
mimics NC vs. miR-181c-5p mimics	0.7167	0.4900 to 0.9433	Yes	****	<0.0001
mimics NC vs. inhibitor NC	-0.11	-0.3366 to 0.1166	No	ns	0.5303
mimics NC vs. miR-181c-5p inhibitor	-2.063	-2.290 to -1.837	Yes	****	<0.0001
miR-181c-5p mimics vs. inhibitor NC	-0.8267	-1.053 to -0.6000	Yes	****	<0.0001
miR-181c-5p mimics vs. miR-181c-5p inhibitor	-2.78	-3.007 to -2.553	Yes	****	<0.0001
inhibitor NC vs. miR-181c-5p inhibitor	-1.953	-2.180 to -1.727	Yes	****	<0.0001
Figure 2C
Medium control	shRNA NC	shRNA-1	shRNA-2	shRNA-3
0.94	0.92	0.24	0.27	0.37
0.98	1.01	0.25	0.28	0.34
1.08	1.05	0.25	0.31	0.35
analysis of variance (ANOVA)
Tukey's multiple comparisons test	Mean Diff.	95.00% CI of diff.	Significant?	Summary	Adjusted P Value
Medium control vs. shRNA NC	0.006667	-0.1155 to 0.1288	No	ns	0.9997
Medium control vs. shRNA-1	0.7533	0.6312 to 0.8755	Yes	****	<0.0001
Medium control vs. shRNA-2	0.7133	0.5912 to 0.8355	Yes	****	<0.0001
Medium control vs. shRNA-3	0.6467	0.5245 to 0.7688	Yes	****	<0.0001
shRNA NC vs. shRNA-1	0.7467	0.6245 to 0.8688	Yes	****	<0.0001
shRNA NC vs. shRNA-2	0.7067	0.5845 to 0.8288	Yes	****	<0.0001
shRNA NC vs. shRNA-3	0.64	0.5178 to 0.7622	Yes	****	<0.0001
shRNA-1 vs. shRNA-2	-0.04	-0.1622 to 0.08216	No	ns	0.8138
shRNA-1 vs. shRNA-3	-0.1067	-0.2288 to 0.01549	No	ns	0.0952
shRNA-2 vs. shRNA-3	-0.06667	-0.1888 to 0.05549	No	ns	0.4258
Figure 2D
Medium control	shRNA NC	shOIP5-AS1
1.08	1.01	2.54
1.04	1.04	2.7
0.88	0.96	2.3
Tukey's multiple comparisons test	Mean Diff.	95.00% CI of diff.	Significant?	Summary	Adjusted P Value
Medium control vs. shRNA NC	-0.003333	-0.3375 to 0.3308	No	ns	0.9995
Medium control vs. shOIP5-AS1	-1.513	-1.847 to -1.179	Yes	****	<0.0001
shRNA NC vs. shOIP5-AS1	-1.51	-1.844 to -1.176	Yes	****	<0.0001
Figure 2F
A.pmirGLO-OIP5-AS1 wt+mimic-NC转染组	B.pmirGLO-OIP5-AS1 mut+mimic-NC转染组	C.pmirGLO-OIP5-AS1 wt+miR-181c-5p mimic转染组	D.pmirGLO-OIP5-AS1 mut+miR-181c-5p mimic转染组
0.98	0.8	0.47	0.99
1.09	0.96	0.57	1.11
0.93	0.95	0.49	1.18
1.1	1.17	0.52	0.99
0.96	0.97	0.46	1.15
0.94	1.08	0.47	1.21
0.91	1	0.5	1.05
1.09	0.81	0.49	0.92
1.01	0.91	0.42	0.9
SPSS Independent-Samples T Tests
A vs C	degree of freedom	P value	Mean difference	Standard error difference
	16	＜0.0001	0.47333	0.041641
