# Supplementary material for: LncRNA OIP5-AS1 modulates the proliferation and apoptosis of Jurkat cells by sponging miR-181c-5p to regulate IL-7 expression in myasthenia gravis
Source: PeerJ. 2022 May 17;10:e13454. doi: 10.7717/peerj.13454 (PMC9121865; doi:10.7717/peerj.13454)
Supplement: Supplemental Information 4 — (A) IL-7 expression was examined in MG patients and control subjects by real-time PCR. (B) Pearson’s correlation was performed to analyze the correlation between IL-7 and miR-181c-5p expression in PBMCs of MG patients. (C) Pearson’s correlation was performed to analyze the correlation between IL-7 and OIP5-AS1 expression in PBMCs of MG patients. (D) Relative expression levels of IL-7 mRNA were measured by real-time PCR after transfection with miR-181c-5p mimic or miRNA NC in Jurkat cells. (E) Relative expression levels of IL-7 protein were measured by western blotting after transfection with miR-181c-5p mimic or miRNA NC in Jurkat cells. (F) Relative expression levels of IL-7 mRNA were measured by real-time PCR after transfection with shRNA NC + miR-181c-5p inhibitor NC, shOIP5-AS1 + miR-181c-5p inhibitor NC, and shOIP5-AS1 + miR-181c-5p inhibitor in Jurkat cells. (G) Relative expression levels of IL-7 protein were measured by western blotting after transfection with shRNA NC + miR-181c-5p inhibitor NC, shOIP5-AS1 + miR-181c-5p inhibitor NC, and shOIP5-AS1 + miR-181c-5p inhibitor in Jurkat cells. The experiment was repeated at least three times, and data are presented as the mean ± SD. *p < 0.05, **p < 0.01, ***p < 0.001. ns, no significant. [file peerj-10-13454-s004.xlsx]

## Sheet: Sheet1
Figure 3A			Figure 3B			Figure 3C
Control	MG		miR-181c-5p	IL-7		OIP5-AS1	IL-7
0.437224	0.614057		1.22774	1.24526		0.871859	1.24526
0.575589	0.692448		1.41683	0.924307		0.904693	0.924307
0.62696	0.743864		0.932602	1.06175		0.908883	1.06175
0.632781	0.888706		1.06388	0.896957		0.95407	0.896957
0.671959	0.896957		1.01819	1.1301		0.99	1.1301
0.755993	0.899032		0.473904	1.36899		1.00382	1.36899
0.770096	0.924307		0.810003	0.614057		1.00382	0.614057
0.848573	0.941551		0.662504	1.0138		1.0108	1.0138
0.858433	1.0138		1.16824	1.09413		1.02728	1.09413
0.886655	1.06175		0.713342	1.45039		1.05616	1.45039
0.924307	1.09413		0.945621	1.55449		1.15042	1.55449
0.928588	1.10174		1.29474	0.743864		1.17731	0.743864
0.954695	1.1301		0.896681	1.44037		1.22165	1.44037
0.99294	1.15118		1.17229	0.888706		1.22165	0.888706
0.999846	1.20006		0.618138	0.692448		1.25021	0.692448
1.05198	1.21963		0.462011	1.15118		1.37443	1.15118
1.0916	1.24526		1.07624	1.21963		1.38399	1.21963
1.14587	1.25392		0.780606	1.57984		1.40007	1.57984
1.16455	1.34082		1.12194	1.20006		1.40007	1.20006
1.17809	1.36899		0.978968	0.941551		1.40656	0.941551
1.20284	1.37851		0.762777	1.39453		1.42619	1.39453
1.23666	1.39453		0.695441	1.25392		1.46968	1.25392
1.28323	1.414		1.41683	0.899032		1.48675	0.899032
1.30415	1.44037		0.513819	1.70501		1.51449	1.70501
1.37851	1.45039		0.876201	1.64313		1.54989	1.64313
1.43373	1.49462		0.488354	1.414		1.60826	1.414
1.5085	1.55449		0.574084	1.57256		1.66497	1.57256
1.52955	1.55449		0.967723	1.37851		1.72369	1.37851
1.52955	1.57256		0.466301	1.10174		1.73568	1.10174
1.55449	1.57984		0.738498	1.70107		1.81987	1.70107
	1.5982		0.632586	1.55449		1.95726	1.55449
	1.64313		0.530712	1.34082		2.03097	1.34082
	1.70107		0.880259	1.49462		2.05932	1.49462
	1.70501		0.524616	1.5982		2.15173	1.5982
Figure 3A
Levene's Test for Equality of Variances		t-test for Equality of Means
F	Sig.	t	df	Sig. (2-tailed)	Mean Difference	Std. Error Difference	95% Confidence Interval of the Difference
							Lower	Upper
0.009	0.927	-2.531	62	0.0139	-0.194446	0.076812	-0.347991	-0.0409
Figure 3B
Pearson r
r	-0.4455
95% confidence interval	-0.6811 to -0.1264
R squared	0.1985
P value
P (two-tailed)	0.0083
P value summary	**
Significant? (alpha = 0.05)	Yes
Number of XY Pairs	34
Figure 3C
Pearson r
r	0.5355
95% confidence interval	0.2409 to 0.7397
R squared	0.2867
P value
P (two-tailed)	0.0011
P value summary	**
Significant? (alpha = 0.05)	Yes
Number of XY Pairs	34
figure 3D
Medium control	miRNA NC	miR-181c-5p mimics
0.94	0.97	0.24
1.02	0.98	0.26
1.04	1.07	0.25
analysis of variance (ANOVA)
Tukey's multiple comparisons test	Mean Diff.	95.00% CI of diff.	Significant?	Summary	Adjusted P Value
Medium control vs. miRNA NC	-0.006667	-0.1181 to 0.1047	No	ns	0.9816
Medium control vs. miR-181c-5p mimics	0.75	0.6386 to 0.8614	Yes	****	<0.0001
miRNA NC vs. miR-181c-5p mimics	0.7567	0.6453 to 0.8681	Yes	****	<0.0001
Test details	Mean 1	Mean 2	Mean Diff.	SE of diff.	n1	n2	q	DF
Medium control vs. miRNA NC	1	1.007	-0.006667	0.03631	3	3	0.2596	6
Medium control vs. miR-181c-5p mimics	1	0.25	0.75	0.03631	3	3	29.21	6
miRNA NC vs. miR-181c-5p mimics	1.007	0.25	0.7567	0.03631	3	3	29.47	6
figure 3E
Medium control	miRNA NC	miR-181c-5p mimics
1	1.04	0.49
1.04	0.98	0.51
1	0.99	0.45
analysis of variance (ANOVA)
Tukey's multiple comparisons test	Mean Diff.	95.00% CI of diff.	Significant?	Summary	Adjusted P Value
Medium control vs. miRNA NC	0.01	-0.06232 to 0.08232	No	ns	0.907
Medium control vs. miR-181c-5p mimics	0.53	0.4577 to 0.6023	Yes	****	<0.0001
miRNA NC vs. miR-181c-5p mimics	0.52	0.4477 to 0.5923	Yes	****	<0.0001
Test details	Mean 1	Mean 2	Mean Diff.	SE of diff.	n1	n2	q	DF
Medium control vs. miRNA NC	1.013	1.003	0.01	0.02357	3	3	0.6	6
Medium control vs. miR-181c-5p mimics	1.013	0.4833	0.53	0.02357	3	3	31.8	6
miRNA NC vs. miR-181c-5p mimics	1.003	0.4833	0.52	0.02357	3	3	31.2	6
figure 3F
Medium control	shRNA NC +inhibitor NC	shOIP5-AS1 +inhibitor NC	shOIP5-AS1 +inhibitor
1.01	1	0.36	1.19
0.99	0.99	0.38	1.24
1	1.05	0.43	1.3
analysis of variance (ANOVA)
Tukey's multiple comparisons test	Mean Diff.	95.00% CI of diff.	Significant?	Summary	Adjusted P Value
Medium control vs. shRNA NC +inhibitor NC	-0.01333	-0.1100 to 0.08333	No	ns	0.9694
Medium control vs. shOIP5-AS1 +inhibitor NC	0.61	0.5133 to 0.7067	Yes	****	<0.0001
Medium control vs. shOIP5-AS1 +inhibitor	-0.2433	-0.3400 to -0.1467	Yes	***	0.0002
shRNA NC +inhibitor NC vs. shOIP5-AS1 +inhibitor NC	0.6233	0.5267 to 0.7200	Yes	****	<0.0001
shRNA NC +inhibitor NC vs. shOIP5-AS1 +inhibitor	-0.23	-0.3267 to -0.1333	Yes	***	0.0003
shOIP5-AS1 +inhibitor NC vs. shOIP5-AS1 +inhibitor	-0.8533	-0.9500 to -0.7567	Yes	****	<0.0001
Test details	Mean 1	Mean 2	Mean Diff.	SE of diff.	n1	n2	q	DF
Medium control vs. shRNA NC +inhibitor NC	1	1.013	-0.01333	0.03018	3	3	0.6247	8
Medium control vs. shOIP5-AS1 +inhibitor NC	1	0.39	0.61	0.03018	3	3	28.58	8
Medium control vs. shOIP5-AS1 +inhibitor	1	1.243	-0.2433	0.03018	3	3	11.4	8
shRNA NC +inhibitor NC vs. shOIP5-AS1 +inhibitor NC	1.013	0.39	0.6233	0.03018	3	3	29.2	8
shRNA NC +inhibitor NC vs. shOIP5-AS1 +inhibitor	1.013	1.243	-0.23	0.03018	3	3	10.78	8
shOIP5-AS1 +inhibitor NC vs. shOIP5-AS1 +inhibitor	0.39	1.243	-0.8533	0.03018	3	3	39.98	8
figure 3G
Medium control	shRNA NC +inhibitor NC	shOIP5-AS1 +inhibitor NC	shOIP5-AS1 +inhibitor
1	1.04	0.4	0.82
1	0.97	0.41	0.8
0.99	1	0.4	0.73
analysis of variance (ANOVA)
Tukey's multiple comparisons test	Mean Diff.	95.00% CI of diff.	Significant?	Summary	Adjusted P Value
Medium control vs. shRNA NC +inhibitor NC	-0.006667	-0.08438 to 0.07104	No	ns	0.9922
Medium control vs. shOIP5-AS1 +inhibitor NC	0.5933	0.5156 to 0.6710	Yes	****	<0.0001
Medium control vs. shOIP5-AS1 +inhibitor	0.2133	0.1356 to 0.2910	Yes	***	0.0001
shRNA NC +inhibitor NC vs. shOIP5-AS1 +inhibitor NC	0.6	0.5223 to 0.6777	Yes	****	<0.0001
shRNA NC +inhibitor NC vs. shOIP5-AS1 +inhibitor	0.22	0.1423 to 0.2977	Yes	****	<0.0001
shOIP5-AS1 +inhibitor NC vs. shOIP5-AS1 +inhibitor	-0.38	-0.4577 to -0.3023	Yes	****	<0.0001
Test details	Mean 1	Mean 2	Mean Diff.	SE of diff.	n1	n2	q	DF
Medium control vs. shRNA NC +inhibitor NC	0.9967	1.003	-0.006667	0.02427	3	3	0.3885	8
Medium control vs. shOIP5-AS1 +inhibitor NC	0.9967	0.4033	0.5933	0.02427	3	3	34.58	8
Medium control vs. shOIP5-AS1 +inhibitor	0.9967	0.7833	0.2133	0.02427	3	3	12.43	8
shRNA NC +inhibitor NC vs. shOIP5-AS1 +inhibitor NC	1.003	0.4033	0.6	0.02427	3	3	34.97	8
shRNA NC +inhibitor NC vs. shOIP5-AS1 +inhibitor	1.003	0.7833	0.22	0.02427	3	3	12.82	8
shOIP5-AS1 +inhibitor NC vs. shOIP5-AS1 +inhibitor	0.4033	0.7833	-0.38	0.02427	3	3	22.15	8
