# Supplementary material for: LncRNA OIP5-AS1 modulates the proliferation and apoptosis of Jurkat cells by sponging miR-181c-5p to regulate IL-7 expression in myasthenia gravis
Source: PeerJ. 2022 May 17;10:e13454. doi: 10.7717/peerj.13454 (PMC9121865; doi:10.7717/peerj.13454)
Supplement: Supplemental Information 5 — (A) Flow cytometry was performed to determine cell apoptosis after transfection with shRNA NC + miR-181c-5p inhibitor NC, shOIP5-AS1 + miR-181c-5p inhibitor NC, and shOIP5-AS1 + miR-181c-5p inhibitor for 48 h into Jurkat cells. (B) The apoptosis rate of Jurkat cells after transfection with shRNA NC + miR-181c-5p inhibitor NC, shOIP5-AS1 + miR-181c-5p inhibitor NC, and shOIP5-AS1 + miR-181c-5p inhibitor. (C) CCK-8 assay was performed to determine cell proliferation after transfection with shRNA NC + miR-181c-5p inhibitor NC, shOIP5-AS1 + miR-181c-5p inhibitor NC, and shOIP5-AS1 + miR-181c-5p inhibitor into Jurkat cells. The experiment was repeated at least three times, and data are presented as the mean ± SD. *p < 0.05, **p < 0.01, ***p < 0.001. ns, no significant. [file peerj-10-13454-s005.xlsx]

## Sheet: Sheet1
figure 4B
Medium control	shRNA NC +inhibitor NC	shOIP5-AS1 +inhibitor NC	shOIP5-AS1 +inhibitor
5.69	4.88	26.35	5.08
4.7	4.86	30.03	5.98
6.08	4.25	29.23	6.49
analysis of variance (ANOVA)
Tukey's multiple comparisons test	Mean Diff.	95.00% CI of diff.	Significant?	Summary	Adjusted P Value
Medium control vs. shRNA NC +inhibitor NC	0.8267	-2.064 to 3.718	No	ns	0.7976
Medium control vs. shOIP5-AS1 +inhibitor NC	-23.05	-25.94 to -20.16	Yes	****	<0.0001
Medium control vs. shOIP5-AS1 +inhibitor	-0.36	-3.251 to 2.531	No	ns	0.9771
shRNA NC +inhibitor NC vs. shOIP5-AS1 +inhibitor NC	-23.87	-26.76 to -20.98	Yes	****	<0.0001
shRNA NC +inhibitor NC vs. shOIP5-AS1 +inhibitor	-1.187	-4.078 to 1.704	No	ns	0.5797
shOIP5-AS1 +inhibitor NC vs. shOIP5-AS1 +inhibitor	22.69	19.80 to 25.58	Yes	****	<0.0001
Test details	Mean 1	Mean 2	Mean Diff.	SE of diff.	n1	n2	q	DF
Medium control vs. shRNA NC +inhibitor NC	5.49	4.663	0.8267	0.9028	3	3	1.295	8
Medium control vs. shOIP5-AS1 +inhibitor NC	5.49	28.54	-23.05	0.9028	3	3	36.1	8
Medium control vs. shOIP5-AS1 +inhibitor	5.49	5.85	-0.36	0.9028	3	3	0.5639	8
shRNA NC +inhibitor NC vs. shOIP5-AS1 +inhibitor NC	4.663	28.54	-23.87	0.9028	3	3	37.4	8
shRNA NC +inhibitor NC vs. shOIP5-AS1 +inhibitor	4.663	5.85	-1.187	0.9028	3	3	1.859	8
shOIP5-AS1 +inhibitor NC vs. shOIP5-AS1 +inhibitor	28.54	5.85	22.69	0.9028	3	3	35.54	8
figure 4C
Time(hours)	Medium control					shRNA NC+inhibitor NC					shOIP5-AS1+inhibitor NC					shOIP5-AS1+inhibitor
24	0.362	0.332	0.342	0.401	0.419	0.333	0.361	0.351	0.378	0.39	0.26	0.3	0.321	0.3	0.264	0.38	0.332	0.382	0.361	0.311
48	0.662	0.702	0.766	0.702	0.711	0.7	0.649	0.68	0.73	0.561	0.482	0.451	0.54	0.563	0.524	0.57	0.652	0.619	0.69	0.701
72	1.026	1.115	1.206	1.118	1.3	1.126	1.204	1.264	1.32	1.061	0.768	0.762	0.8	0.862	0.811	1.012	1.115	1.207	0.963	0.968
96	1.2	1.234	1.304	1.29	1.151	1.3	1.342	1.4	1.231	1.18	0.857	0.864	0.932	0.914	0.862	1.152	1.206	1.282	1.112	1.183
Figure 4C Absorbance value at 96 h
Tukey HSD	(I) group	(J) group	Mean Difference (I-J)	Std. Error	Sig.	95% Confidence Interval
						Lower Bound		Upper Bound
	Medium control	shRNANC+inhibitor NC	-0.0548	0.04111	0.556436	-0.1724	0.0628
		shOIP5-AS1+inhibitor NC	.35000*	0.04111	1e-06	0.2324	0.4676
		shOIP5-AS1+inhibitor	0.0488	0.04111	0.643282	-0.0688	0.1664
	shRNANC+inhibitor NC	Medium control	0.0548	0.04111	0.556436	-0.0628	0.1724
		shOIP5-AS1+inhibitor NC	.40480*	0.04111	1.89e-07	0.2872	0.5224
		shOIP5-AS1+inhibitor	0.1036	0.04111	0.094549	-0.014	0.2212
	shOIP5-AS1+inhibitor NC	Medium control	-.35000*	0.04111	1e-06	-0.4676	-0.2324
		shRNANC+inhibitor NC	-.40480*	0.04111	1.89e-07	-0.5224	-0.2872
		shOIP5-AS1+inhibitor	-.30120*	0.04111	9e-06	-0.4188	-0.1836
	shOIP5-AS1+inhibitor	Medium control	-0.0488	0.04111	0.643282	-0.1664	0.0688
		shRNANC+inhibitor NC	-0.1036	0.04111	0.094549	-0.2212	0.014
		shOIP5-AS1+inhibitor NC	.30120*	0.04111	9e-06	0.1836	0.4188
* The mean difference is significant at the 0.05 level.
Figure 4C Absorbance value at 72 h
Tukey HSD	(I) group	(J) group	Mean Difference (I-J)	Std. Error	Sig.	95% Confidence Interval
						Lower Bound	Upper Bound
	Medium control	shRNA NC+inhibitor NC	-0.042	0.05861	0.889043	-0.2097	0.1257
		shOIP5-AS1+inhibitor NC	.35240*	0.05861	9.7e-05	0.1847	0.5201
		shOIP5-AS1+inhibitor	0.1	0.05861	0.352656	-0.0677	0.2677
	shRNA NC+inhibitor NC	Medium control	0.042	0.05861	0.889043	-0.1257	0.2097
		shOIP5-AS1+inhibitor NC	.39440*	0.05861	2.6e-05	0.2267	0.5621
		shOIP5-AS1+inhibitor	0.142	0.05861	0.112574	-0.0257	0.3097
	shOIP5-AS1+inhibitor NC	Medium control	-.35240*	0.05861	9.7e-05	-0.5201	-0.1847
		shRNA NC+inhibitor NC	-.39440*	0.05861	2.6e-05	-0.5621	-0.2267
		shOIP5-AS1+inhibitor	-.25240*	0.05861	0.002746	-0.4201	-0.0847
	shOIP5-AS1+inhibitor	Medium control	-0.1	0.05861	0.352656	-0.2677	0.0677
		shRNA NC+inhibitor NC	-0.142	0.05861	0.112574	-0.3097	0.0257
		shOIP5-AS1+inhibitor NC	.25240*	0.05861	0.002746	0.0847	0.4201
* The mean difference is significant at the 0.05 level.
Figure 4C Absorbance value at 48 h
Tukey HSD	(I) group	(J) group	Mean Difference (I-J)	Std. Error	Sig.	95% Confidence Interval
						Lower Bound	Upper Bound
	Medium control	shRNA NC+inhibitor NC	0.0446	0.03239	0.530481	-0.0481		0.1373
		shOIP5-AS1+inhibitor NC	.19660*	0.03239	8.7e-05	0.1039		0.2893
		shOIP5-AS1+inhibitor	0.0622	0.03239	0.258647	-0.0305		0.1549
	shRNA NC+inhibitor NC	Medium control	-0.0446	0.03239	0.530481	-0.1373		0.0481
		shOIP5-AS1+inhibitor NC	.15200*	0.03239	0.001257	0.0593		0.2447
		shOIP5-AS1+inhibitor	0.0176	0.03239	0.946974	-0.0751		0.1103
	shOIP5-AS1+inhibitor NC	Medium control	-.19660*	0.03239	8.7e-05	-0.2893		-0.1039
		shRNA NC+inhibitor NC	-.15200*	0.03239	0.001257	-0.2447		-0.0593
		shOIP5-AS1+inhibitor	-.13440*	0.03239	0.003775	-0.2271		-0.0417
	shOIP5-AS1+inhibitor	Medium control	-0.0622	0.03239	0.258647	-0.1549		0.0305
		shRNA NC+inhibitor NC	-0.0176	0.03239	0.946974	-0.1103		0.0751
		shOIP5-AS1+inhibitor NC	.13440*	0.03239	0.003775	0.0417		0.2271
